# Supplementary material for: Epicutaneous immunization with modified vaccinia Ankara viral vectors generates superior T cell immunity against a respiratory viral challenge
Source: PubMed Central journal article supplement (PMC7782760; doi:10.1038/s41541-020-00265-5), 2021-01-04
Supplement: 41541_2020_265_MOESM1_ESM.pdf [file 41541_2020_265_MOESM1_ESM.pdf]

1 **Supplementary Figure Legends**

2 **Supplementary Figure 1. MVA skin scarification induced smaller pox lesions that healed**  
3 **significantly faster compared to VACV skin scarification in immunocompetent mice.**

4 C57BL/6 mice were immunized with  $1.8 \times 10^6$  pfu MVA or VACV by skin scarification.  
5 Photographs of pox lesion were taken on day 4, 7, 14 and 28 post-immunization.

6 **Supplementary Figure 2. Delivery of MVA via s.s. generates stronger cellular responses**  
7 **compared to i.d., s.c., and i.m. infection routes.** C57BL/6 mice were immunized with  $1.8 \times$

8  $10^6$  pfu MVA via indicated routes. Activated T cells in draining lymph nodes (a) and spleen (b)  
9 were isolated at 7 days post infection, and T cell response against VACV was measured based on  
10 IFN- $\gamma$  secretion. Symbols represent individual mice (n = 5 mice/group). \*p < 0.05, \*\*p < 0.01.

11 **Supplementary Figure 3. Delivery of MVA via s.s. generates T cells that are qualitatively**  
12 **distinct from those generated from i.d., s.c., i.m.. a-b.** Venn diagram analysis of genes up-

13 regulated (a) or down-regulated (b) in pairwise comparisons between T cells activated via MVA  
14 s.s., i.d., s.c., i.m. (day 5) relative to that of T<sub>N</sub>. **c-d.** Fold change analysis of genes shared among  
15 s.s., i.d., s.c. and i.m. activated T cells (day 5) relative to that of T<sub>N</sub>. c, 146 shared up-regulated  
16 genes, d, 41 shared down-regulated genes. **e.** qRT-PCR analysis of cell homing molecule gene  
17 expression in s.s., i.d., s.c. and i.m. activated T cells (day 5) relative to that of T<sub>N</sub>. Graphs show  
18 the mean  $\pm$  s. d. (n=5). ns = not significant, \*p < 0.05, \*\*p < 0.01.

19 **Supplementary Figure 4. Phenotyping of tissue-resident memory T cell surface marker on**  
20 **lung CD8<sup>+</sup> T<sub>RM</sub> cells generated by MVA infection via skin scarification, intra-tracheal**

21 **administration or intra-peritoneal injection.** Flow cytometric analysis of T cell proliferation  
22 and homing receptor expression on OT-I cells residing in lung at 45 days post MVA infection.

23 Naïve OT-I Thy1.1<sup>+</sup> cells were transferred into Thy1.2<sup>+</sup> recipient mice one day before mice were  
24 infected with  $1.8 \times 10^6$  pfu MVA-Ova by s.s., i.t. or i.p.. At 45 days after infection, proliferation  
25 and tissue-homing receptor expression of OT-I T<sub>RM</sub> cells isolated from lung tissue were analyzed  
26 by flow cytometry. Data are representative of three independent experiments (n = 5 mice per  
27 group). ESL, E-selectin ligand.

28 **Supplementary Figure 5. Skin T<sub>RM</sub> cells generated by MVA infection via skin scarification,**  
29 **intra-tracheal administration or intra-peritoneal injection.** Flow cytometric analysis and  
30 quantification of skin T<sub>RM</sub> cells at day 45 post  $1.8 \times 10^6$  pfu MVA infection via indicated routes.  
31 Data are representative of three independent experiments (n = 5 mice per group). Graphs show  
32 the mean  $\pm$  s. d. (n=5). \*\*p < 0.01.

33 **Supplementary Figure 6. Gating strategy for the analysis of memory OT-I cell populations.**

34 **Supplementary Table 1. List of abbreviation.**

Day 4

Day 7

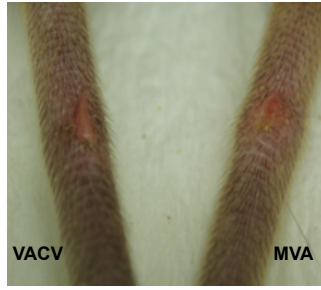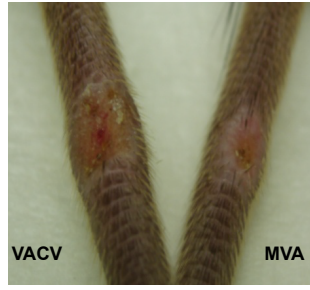

Day 14

Day 28

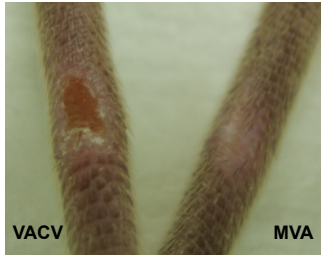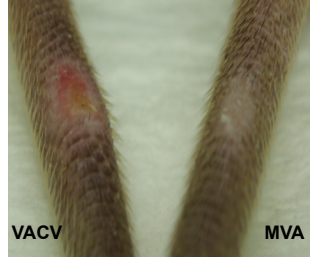

**Supplementary Figure 1**

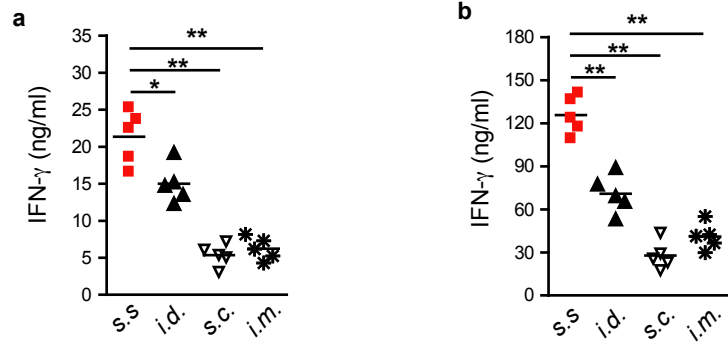

Supplementary Figure 2

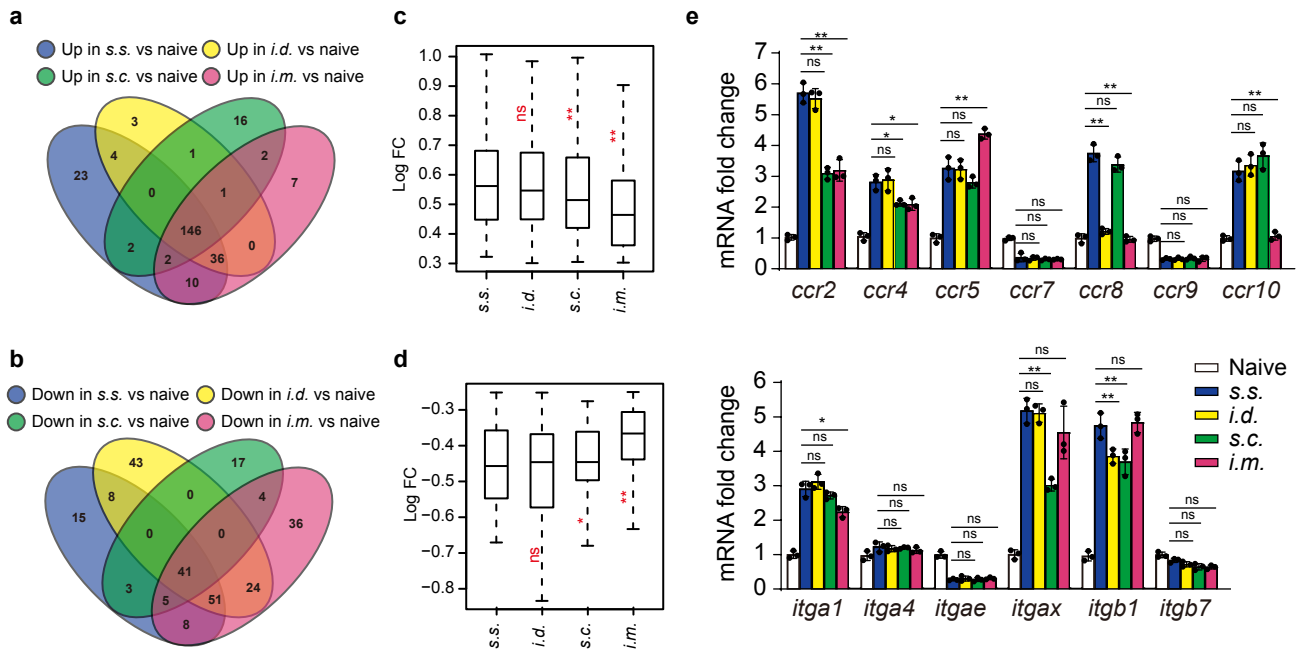

Supplementary Figure 3

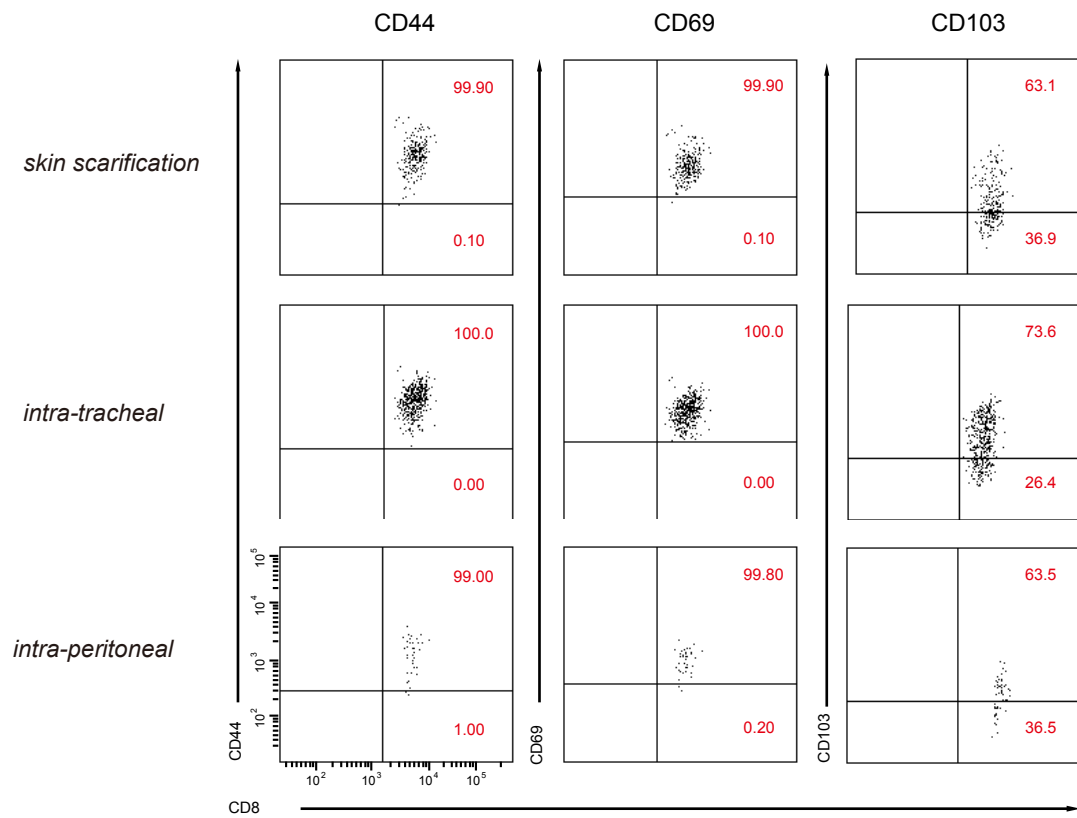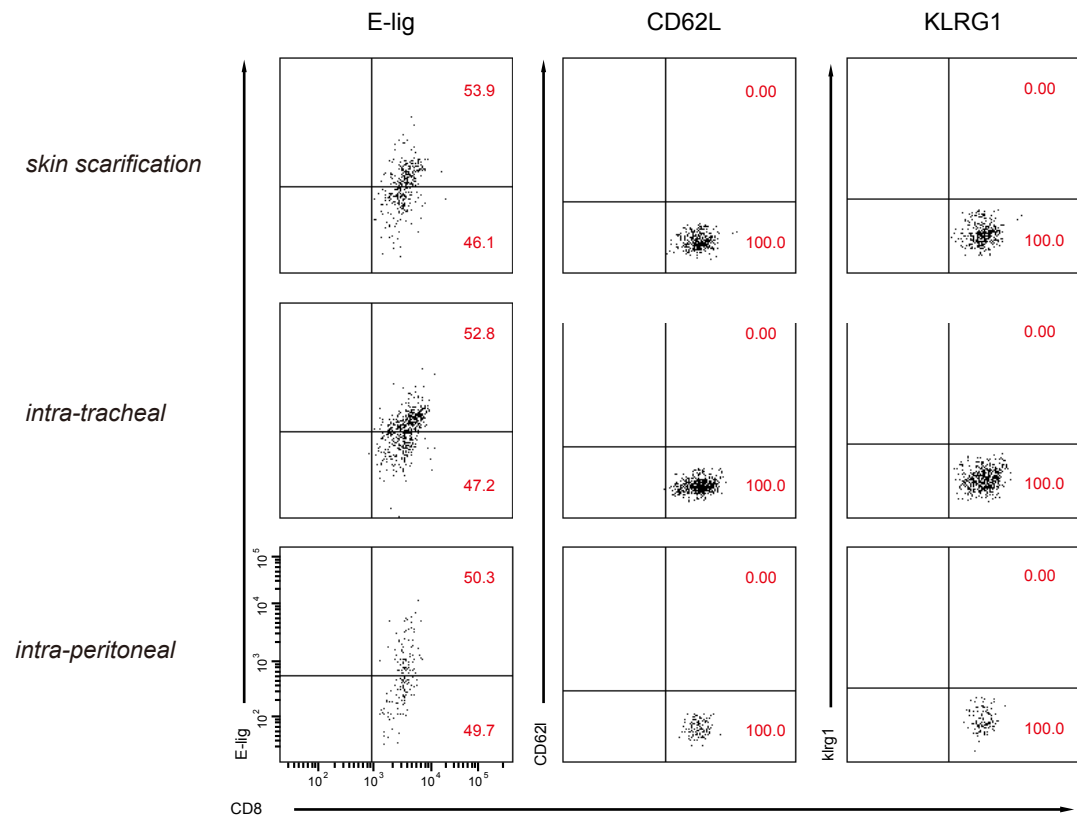

Supplementary Figure 4

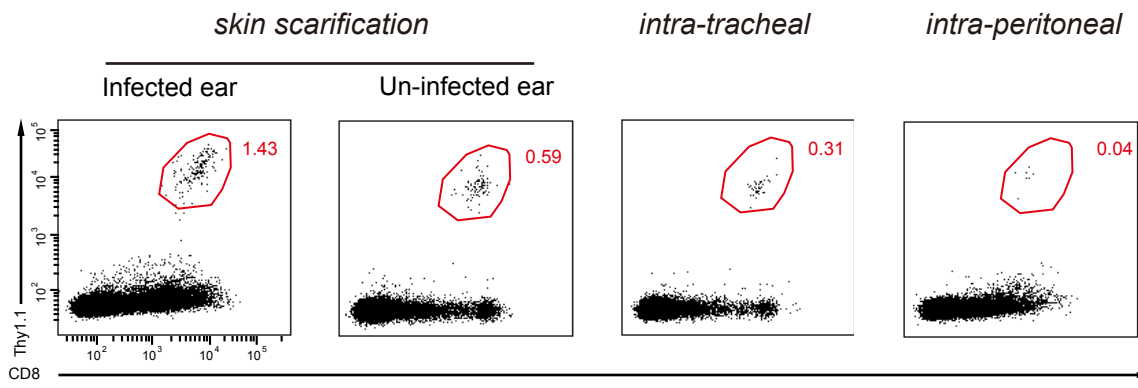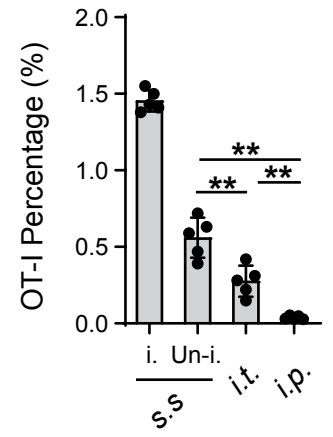

Supplementary Figure 5

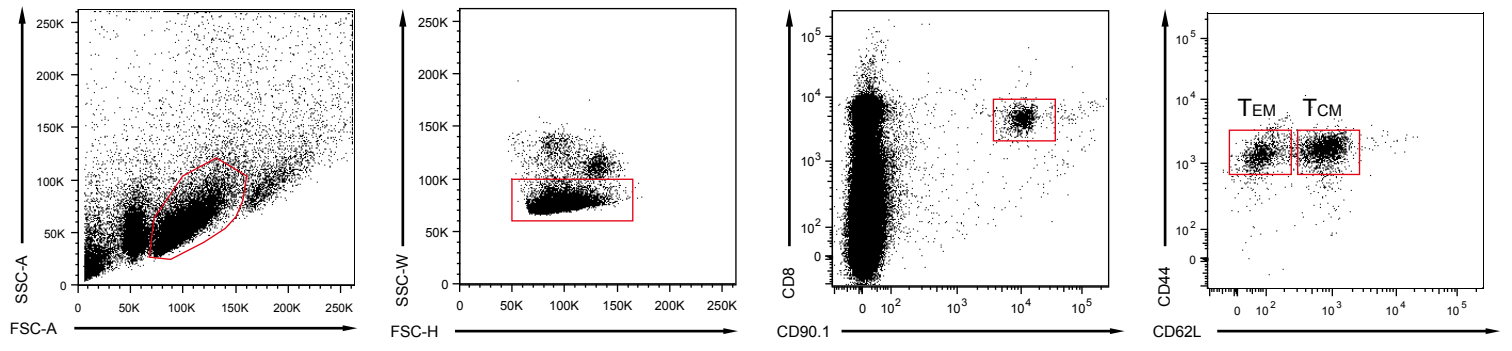

Supplementary Figure 6



| <b>Abbreviation</b> | <b>Definition</b>              |
|---------------------|--------------------------------|
| MVA                 | Modified Ankara Virus          |
| VACV                | Vaccinia Virus                 |
| OVA                 | Ovalbumin                      |
| WR-VACV             | Western-reserve Vaccinia Virus |
| s.s.                | skin scarification             |
| i.d.                | intra dermal                   |
| s.c.                | subcutaneous                   |
| i.m.                | intramuscular                  |
| i.t.                | intratracheal                  |
| i.p.                | intraperitoneal                |
| T <sub>eff</sub>    | Effector T cells               |
| TRM                 | Tissue resident memory T cells |
| T <sub>CM</sub>     | Central Memory T cells         |
| T <sub>EM</sub>     | Effector Memory T cells        |
| LN                  | lymph nodes                    |
| PCA                 | Principle Component Analysis   |
| WT                  | wide-type                      |
| BW                  | Body Weight                    |
| qRT-PCR             | Quantitative real time PCR     |

**Supplementary Table 1**
